# **The human cerebellum is essential for modulating perceptual sensitivity based on temporal expectations**

SHORT TITLE: Cerebellar control of temporal attention

Assaf Breska and Richard B. Ivry

Department of Psychology and Helen Wills Neuroscience Institute

University of California, Berkeley, CA 94720-1650

Corresponding author:

Assaf Breska

2121 Berkeley Way, Berkeley, CA 94720-1650

[assaf.breska@berkeley.edu](mailto:assaf.breska@berkeley.edu)

## Abstract

A functional benefit of attention is to proactively enhance perceptual sensitivity in space and time. Although attentional orienting has traditionally been associated with cortico-thalamic networks, recent evidence has indicated that individuals with cerebellar degeneration (CD) show reduced reaction time benefit from temporal cues that entail an interval-based representation. While this deficit might merely reflect impairment in anticipatory motor preparation, it is also possible that the cerebellum contributes to the temporal modulation of perceptual sensitivity. To examine this, we tested CD participants on a non-speeded challenging perceptual discrimination task, asking if they benefit from temporal cues. Strikingly, the CD group showed no duration-specific perceptual sensitivity benefit when temporal orienting relied on isolated interval representation, while showing a comparable benefit to controls when the cues were defined by rhythmic sequences. This dissociation further specifies the functional domain of the cerebellum, establishing its role in the attentional adjustment of perceptual sensitivity in time.

## Introduction

Adaptive behavior is facilitated by an attentional system that can proactively modify the state of perceptual systems. While the majority of research on the underlying mechanisms has focused on spatial orienting, the brain is also anticipatory in time<sup>1</sup>. Temporal predictions for forthcoming sensory events are used to adjust attention in time, manifest in increased perceptual sensitivity at expected compared to unexpected times<sup>2,3</sup>. This form of anticipation has been associated with left inferior parietal and ventral premotor cortices<sup>4-6</sup>, a network that overlaps with frontal-parietal components of the cortico-thalamic network implicated in attentional orienting in space<sup>7-9</sup>.

Recently, we reported that individuals with cerebellar degeneration (CD) fail to exhibit reaction time benefits from temporal cues on a simple detection task<sup>10,11</sup>. These findings implicate the cerebellum in temporal preparation, and raise the possibility that it is involved in temporal control of attention to proactively modulate perception. However, reaction time benefits in speeded detection tasks from temporal cues may result from a change in perceptual sensitivity or from a change in motor preparation<sup>3,12,13</sup>. Given the well documented role of the cerebellum in precisely timed movement<sup>14,15</sup>, the impairments we observed in the CD group may reflect a novel manifestation of the cerebellar role in the temporal control of motor preparation<sup>16</sup>. Determining the functional domain of the cerebellum in attention is critical to both models of attention and cerebellar function.

To address this question, we compared the ability of individuals with cerebellar degeneration (CD) and age-matched healthy controls to use temporal cues to benefit performance in a difficult non-speeded perceptual discrimination task. Participants judged the orientation of a briefly presented visual target. In each trial, a temporal cue indicated that the interval between the

target and a preceding warning signal (WS) would either be 600 or 1000 ms (Figure 1A). Targets mostly appeared at the cued time (valid trials) and rarely at the uncued time (invalid trials). The target contrast was titrated to near-threshold level to make the task perceptually demanding and participants could only respond after a substantial delay following target offset, eliminating the need for motor preparation. With these manipulations, we assume that the expected performance advantage on valid compared to invalid trials ('validity effect' <sup>2,4,17-19</sup>) will reflect temporally-focused enhancement of perceptual sensitivity. If the cerebellum has a causal role in temporal orienting at a non-motor, attentional level, the validity effect should be reduced in CD patients relative to controls.

In addition to manipulating the validity of the temporal cue, we also varied the manner in which this information was presented. In our previous work, we found that the cerebellar involvement was limited to when temporal anticipation required encoding and recalling an isolated interval, but not when temporal anticipation could emerge via synchronization with a stream of rhythmic sensory events. We employ a similar manipulation in the present study, comparing attentional benefits from interval and rhythmic temporal cues (Figure 1B).

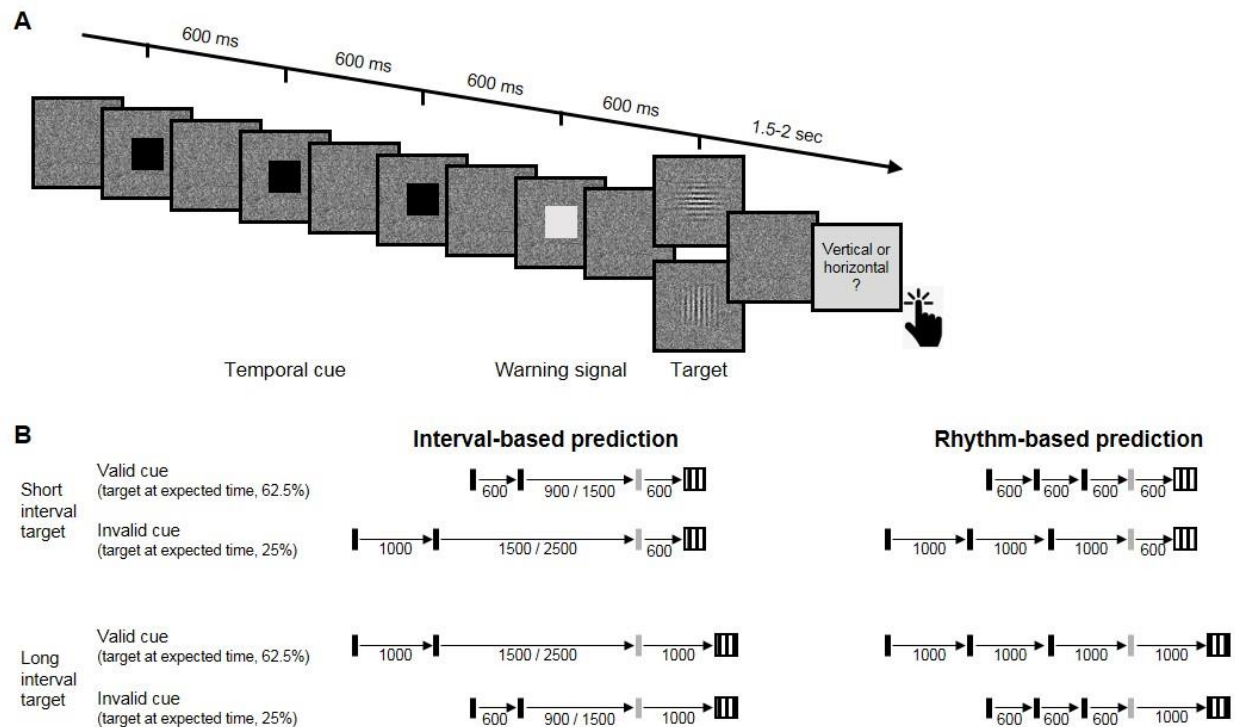

**Figure 1. Experimental task.** **A.** Trial sequence, depicting a trial with the faster rhythmic temporal cue. Participants viewed a visual stream of black squares (temporal cue), followed by a white square (warning signal, WS), and then a luminance-defined Gabor grating (target). Participants made a delayed, non-speeded judgment of the orientation of the grating. Continuous dynamic masking was generated by a white noise visual stimulus mask that changed at 60 Hz. Whereas the black and white squares were highly visible when superimposed on the mask, the target was embedded in the noise, reducing its visibility. The target contrast was set on an individual basis using an adaptive procedure. **B.** Temporal cue conditions. The target could appear at a short (600 ms, top) or long (1000 ms, bottom) interval after the WS. Left: Interval task. Two black squares were separated by either the short or long interval, with a random non-isochronous interval between the second black square and the WS. On valid trials (62.5%), this interval matched the WS-target interval; on invalid trials (25%), it matched the other interval (with the remaining ‘catch’ trials containing no target). Right: Rhythm task. Three black squares and the WS appeared with identical SOA (short / long). Valid and invalid trials were as in the Interval task.

## Results

Perceptual sensitivity was quantified using  $d'$ , a measure derived from signal-detection theory<sup>20</sup>. The benefits of temporal orienting or validity effect would be manifest as a larger  $d'$  on valid trials compared to invalid trials. A 4-way omnibus analysis of variance (ANOVA) revealed a significant validity effect across groups, tasks and target intervals (main effect of Cue Validity:  $F(1,23)=13.79$ ,  $p=0.001$ ,  $\eta_p^2=0.37$ ). Prior work has shown that the validity effect is less robust, or even absent for late targets<sup>17,21</sup>. Thus, we developed an a priori analysis plan that focuses on the early target trials to increase sensitivity for detecting attenuation of the validity effect (see Methods). As expected, the validity effect was larger when the target appeared at the early onset time (Cue Validity X Interval interaction:  $F(1,23)=3.59$ , one-tailed  $p=0.035$ ,  $\eta_p^2=0.14$ ). Indeed, neither group showed a significant validity effect in either task for the late onset targets (all  $p$ 's > 0.1).

Analysis of the  $d'$  values for early onset targets revealed a significant validity effect (3-way ANOVA,  $F(1,23)=14.74$ ,  $p=0.001$ ,  $\eta_p^2=0.39$ ). Across tasks, the validity effect was larger in the Control compared to the CD group ( $F(1,23)=5.05$ ,  $p=0.034$ ,  $\eta_p^2=0.18$ ), but this effect was qualified by a significant Cue Validity X Group X Task interaction ( $F(1,23)=4.52$ ,  $p=0.044$ ,  $\eta_p^2=0.16$ ). We used a series of planned contrasts to evaluate the validity effect within each task. For the Interval task (Figure 2A), the validity effect was significantly smaller in the CD group relative to the Control group (2-way ANOVA, Cue Validity X Group interaction:  $F(1,23)=7.11$ ,  $p=0.014$ ,  $\eta_p^2=0.24$ ). The Control group showed a higher mean  $d'$  for valid compared to invalid trials ( $t(11)=3.08$ ,  $p=0.01$ , Cohen's  $d=0.89$ ), while  $d'$  values in the CD group were not significantly different, and even numerically higher on invalid trials ( $t(12)=-0.43$ ,  $p=0.67$ ,  $BF_{10}=0.21$ , moderate

evidence against a directional hypothesis of a validity effect). Thus, the CD group failed to show an enhancement in perceptual sensitivity from an interval-based temporal cue.

A different pattern was observed on the Rhythm task (Figure 2B). Here, the magnitude of validity effect did not differ between the two groups ( $F(1,23)=0.09$ ,  $p=0.77$ ,  $\eta_p^2<0.01$ ,  $BF_{10}=0.3$ ). The Control group again showed a validity effect ( $t(11)=2.69$ ,  $p=0.021$ , Cohen's  $d=0.78$ ). However, unlike in the Interval task, the CD group also showed a validity effect ( $t(12)=3.36$ ,  $p=0.006$ , Cohen's  $d=0.93$ ). Thus, the ability to increase perceptual sensitivity at a specific time point based on a rhythm cue was preserved in the CD group. Furthermore, the presence of the 3-way interaction implies that the attenuation of the validity effect in the CD group relative to controls was significantly larger in the Interval task than in the Rhythm task.

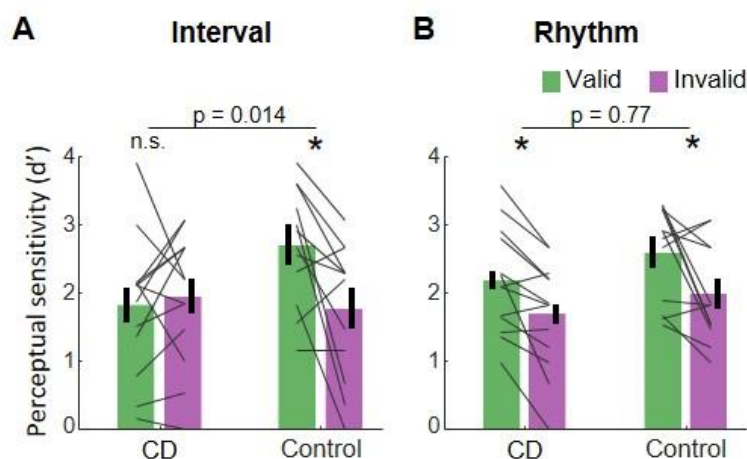

Figure 2. Absence of validity effect in individuals with cerebellar degeneration in interval-based temporal anticipation. A. Interval task. Mean  $d'$  for temporally expected (valid) and unexpected (invalid) for the CD and Control groups. Unlike the controls, the CD group showed no increase in  $d'$  when the target appeared at the expected time. B. Rhythm task. Both groups show a similar increase in  $d'$  on valid trials. \*  $p<0.05$ . In both A and B, error bars represent one standard error of the mean (SEM). Gray lines depict individual subject data.

## Discussion

Our results provide compelling evidence that the integrity of the human cerebellum is necessary for proactive modulation of perceptual processing based on temporal expectations. The ability to use a temporal cue to enhance perceptual sensitivity at specific times was abolished in individuals with cerebellar degeneration when prediction was based on an interval cue. In contrast, the CD group showed a comparable benefit to controls when temporal orienting was based on a rhythmic cue. Critically, the use of a non-speeded, challenging perceptual discrimination task argues strongly against the idea that the impairment is related to motor preparation processes. Rather, the results point to an essential context-specific role of the cerebellum in the temporal control of visual attention, adding to the substantial literature highlighting cerebellar involvement in a broad range of cognitive functions beyond the motor domain <sup>22</sup>.

These findings point to the need for an expanded picture of the neuroanatomical network involved in attentional control. Attention research has traditionally emphasized cortico-thalamic networks, and in particular, dorsal and ventral fronto-parietal networks associated with top-down and stimulus-driven attention control, respectively <sup>7-9</sup>. For attention in the time domain, human imaging studies consistently reveal activations of the left inferior parietal cortex and the ventral premotor cortex <sup>4-6</sup>. Similarly, neural signatures of temporal anticipation identified in human electrophysiology studies have been localized to cortico-thalamic circuits <sup>23,24</sup>. In general, the cerebellum has not featured in this work (but see, for example <sup>25</sup>). This might reflect the difficulty in neuroimaging studies to separate the effects of temporal prediction on neural activations from the effects of other task parameters, or the difficulty of electrophysiology studies to measure cerebellar sources.

Our neuropsychological approach provides a more direct method to evaluate the contribution of the cerebellum to attention. Previous work, focusing on the spatial domain, has proven inconclusive. Some studies have found that individuals with focal cerebellar lesions show reduced benefits from cues indicating the spatial location of a forthcoming stimulus<sup>26,27</sup>. However, it has been proposed that these impairments may be motoric in nature, with the tasks confounding attentional demands with demands on eye movements and/or response preparation<sup>28,29</sup>. These concerns do not apply to the current study given that the spatial aspects of the task were fixed and the motor requirements were minimal, delayed until well after stimulus offset. We note that the current results do not address the question of whether the cerebellum, in addition to its role in temporal attention, is also involved in other spheres of attention.

The dissociation between the impairment in the interval task and the preserved performance in the rhythm task in the CD group has two important implications. First, a longstanding debate in the timing literature concerns whether temporal anticipation in a rhythmic context is mediated by rhythm-specific mechanisms (e.g., entrainment) or by the repeated operation of an interval-based mechanism<sup>19,30,31</sup>. Our results are at odds with the latter hypothesis given that the CD group failed to benefit from the interval cues yet showed normal benefits from the rhythm cues.

Second, selective contributions of the cerebellum in interval-based but not rhythm-based timing have been observed in multiple timing domains, including duration judgments, timed movement, and timed motor preparation<sup>10,11,32,33</sup>. Our findings extend this functional specificity to the attentional domain, pointing to a generalized role for the cerebellum in interval timing, at in the sub-second range. Notably, while inferences from single dissociations such as that observed in the present study can be limited by concerns about differences in task difficulty, this concern is

alleviated by the comparable benefits observed in healthy controls from interval- and rhythm-based cues<sup>10,11,19</sup> (also observed in current dataset: Cue Validity X Task interaction within the Control group,  $F(1,11)=0.81$ ,  $p=0.39$ ,  $\eta_p^2=0.07$ ).

Computationally, how might the cerebellum contribute to the control of attention in time? Given the cerebellar involvement in interval-based timing across timing domains, an intuitive hypothesis is that the cerebellum is necessary for the representation of isolated intervals<sup>14,34</sup>. By this view, predictive processing in non-cerebellar circuits relies on cerebellar interval representations to parameterize the temporal dimension of the prediction. In rhythm-based orienting, an interval-based mechanism would not be required as the temporal parameters are contained within ongoing neural dynamics. However, a broader hypothesis is that the interval-based prediction itself is formed within the cerebellum, part of the cerebellar role in prediction in the motor domain and beyond<sup>22,35,36</sup>. By this view, these cerebellar temporal predictions guide proactive modulation in non-cerebellar circuits according to task goals (e.g., to prepare perceptual or motor systems). In rhythm-based orienting, dedicated prediction mechanisms are not necessary due to the self-sustaining limit-cycle properties of the putatively entrained oscillatory dynamics. Future work should aim to explore the separability of timing and prediction, identifying the cerebellar computations that provide the essential information for temporal orienting.

## Materials and Methods

### Participants

15 individuals with cerebellar degeneration (CD) and 14 neurotypical control individuals were recruited for the study. The data from two individuals from each group were discarded: One was unable to perform the task, two showed no convergence on the staircase procedure used to determine the perceptual threshold, and one asked to terminate the session prematurely. Thus, the final sample size was 13 CD and 12 control participants. All participants provided informed consent and were financially compensated for their participation. The study was approved by the Institutional Review Board at the University of California, Berkeley.

Participants in the CD group 9 females, 12 right-handed, mean age=56.2 years, sd=11.1) had been diagnosed with spinocerebellar ataxia, a slowly progressive adult-onset degenerative disorder in which the primary pathology involves atrophy of the cerebellum. We did not test patients who presented symptoms of multisystem atrophy. Eight individuals in the CD group had a specific genetic subtype (SCA3=2, SCA6=3, SCA17=1, SCA35=1, AOA2=1) and the other 5 individuals had CD of unknown/idiopathic etiology. All of the CD participants provided a medical history to verify the absence of other neurological conditions, and were evaluated at the time of testing with the Scale for the Assessment and Rating of Ataxia (SARA, Schmitz-Hübsch et al., 2006). The mean SARA score was 13.5 (sd=6.3). Control participants (8 females, 11 right-handed, mean age=59.1, sd=10.2) were recruited from the same age range as the CD group, and, based on self-reports, did not have a history of neurological or psychiatric disorders. The CD and Control groups did not differ significantly in age ( $p=0.52$ ).

All participants were prescreened for normal or corrected-to-normal vision and intact color vision. We also screened for professional musical training or recent amateur participation in

musical activities (e.g., playing a musical instrument or singing in a choir), with the plan to exclude individuals with such experience (none did). All of the participants completed the Montreal Cognitive Assessment (MoCA) as a simple assessment of overall cognitive competence. Although we did not select participants to provide a match on this measure, there was no significant group difference (CD: mean=26.7, Control: mean=27.5,  $p=0.32$ ).

## Stimuli and task

For the experimental task, participants discriminated the orientation of a masked visual target, whose timing was cued on each trial (Figure 1). The target was a grayscale, luminance-defined sinusoidal Gabor gratings (size: 400 x 400 pixels, 11 x 11 cm, 10° visual angle; spatial frequency = 1 cycle/degree; Gaussian standard deviation = 2.5°) that was either oriented horizontally or vertically. The target was embedded in a dynamic, white noise mask. This mask was a square (size: 400 x 400 pixels) in which each pixel was randomly assigned a luminance value between 0.25 to 0.75 (with 0 and 1 being black, RGB: [0,0,0] and white, RGB: [255,255,255] respectively). The luminance value for each pixel in the mask was updated every 16.6 ms (once per monitor refresh cycle) throughout the trial. The contrast of the target relative to the background noise was adjusted for each participant (see below). Temporal cues were provided by black squares (size: 200 x 200 pixels, 5.5 x 5.5 cm, 5° visual angle). All stimuli were created in MATLAB (MathWorks, Natick, MA) and presented using the Psychtoolbox v.3.0 package for MATLAB<sup>38,39</sup>. The stimuli were presented foveally on a gray background (RGB: [128,128,128]) on a 24-in monitor (resolution: 1920 x 1080 pixels, refresh rate: 60 Hz) at a viewing distance of ~65 cm.

The dynamic noise mask remained visible throughout the duration of the trial. The other stimuli were superimposed on this mask. The suprathreshold temporal cue involved the serial

presentation of two or three black squares (100 ms duration each), with the first black square always appearing 750 ms after the onset of the dynamic mask. The black squares were followed by a suprathreshold white square, the warning signal (WS, also 100 ms duration), which was followed in turn by the near-threshold target (50 ms duration) after either 600 ms (early target) or 1000 ms (late target). Note that given the screen refresh rate, the 50 ms target was successively embedded in three different masks.

The dynamic noise mask remained visible until 1700 ms after WS onset regardless of the target timing (1100 ms after early target onset, 700 ms after late target onset). 400-900 ms (randomly jittered) after the termination of the dynamic mask, the participant was cued to make a non-speeded response, indicating the perceived orientation of the target (e.g., “*vertical (press X)* ? *horizontal (press M)*”). Responses were made with the X and M keyboard keys, assigned randomly for each participant and fixed for the entirety of the experiment.

Two types of sequences, tested in separate blocks, were used to provide temporal cues. In the Interval task, the sequence consisted of two black squares, with a stimulus onset asynchrony (SOA) of either 600 ms (short cue) or 1000 ms (long cue). The SOA between the second black square and WS was randomly set on each trial to be either 1.5 or 2.5 times the cue interval on that trial (short cue trials: 900 / 1500 ms; long cue trials: 1500 / 2500 ms), strongly reducing any periodicity between the timing of the cue and target<sup>19</sup>. In the Rhythm task, the sequence consisted of three black squares, presented periodically with an SOA of 600 ms (short cue, equivalent to 1.66 Hz) or 1000 ms (long cue, 1 Hz). The SOA between the third black square and WS was the same duration as the cue SOA for that trial. Thus, the WS fell on the “beat” established by the temporal cues.

In both tasks, the SOA between the WS and target was either the same SOA as defined by the temporal cue (valid trial, 62.5% of trials) or the non-cued SOA (invalid trials, 25% of trials). This ratio was selected to incentivize the participant to use the temporal cues to facilitate performance on this challenging task. On the remaining 12.5% of the trials, no target was presented. We included these catch trials to discourage participants from re-orienting their attention in time to the long interval when they failed to detect an early onset target.

## Procedure

Upon arrival, all participants provided consent, demographic information, and completed the MoCA. The CD participants also provided their clinical history and were evaluated with the SARA.

The experiment was conducted in a quiet, dimly lit room. The session began with a familiarization stage, in which participants performed four practice trials with 100% target contrast followed by four with 40% target contrast. The latter were included to demonstrate to the participants how difficult it could be to make a simple orientation judgment when the contrast of the target was similar to that of the mask.

Following this familiarization phase, we used an adaptive method to determine, on an individual basis, the target contrast level expected to produce discrimination accuracy of ~79% (descending staircase procedure, 3 down 1 up, step size = 2%, 10 reversals<sup>40</sup>). We opted to target 79% accuracy to provide sufficient room to detect improvement (to a ceiling of 100% performance) or impairment (to a floor of 50% performance). Importantly, for this adaptive procedure only rhythmic temporal cues were used, and the target always appeared at the expected time (valid). Our reasoning here was that if the CD group were able to use the temporal cues to

modulate perception, it is more likely to occur in this task (and have a similar threshold value as controls) given previous work showing that these individuals are not impaired in utilizing rhythmic temporal cues<sup>10</sup>. In this way, we would be positioned to ask if the CD group showed an impaired validity effect in the Rhythm task as well as overall performance (valid and invalid trials) on the Interval task. The contrast level identified from the adaptive procedure for a given individual was used in the main experiment for both tasks. Consistent with our expectation, the mean contrast level did not differ between groups ( $t(23)=0.83, p=0.41$ ).

In the main experiment, participants preformed four blocks of each task, alternating between Rhythm and Interval blocks (8 blocks total). Each block consisted of 32 trials, 16 with the short temporal cue and 16 with the long temporal cue. Of these 16 trials, the target appeared at the cued time on 10 trials (valid), the uncued time on 4 trials (invalid), and did not appear on 2 trials (catch). When present, the target was horizontal on 50% of the trials and vertical on the other 50% of the trials. Short breaks were provided between each block.

To ensure that the target contrast fell in a range that would be optimal for detecting a validity effect, we calculated the averaged performance on valid trials across the two tasks after each pair of blocks. If the value was higher than 95%, we reduced the target contrast for subsequent blocks by 4%, and if it was lower than 60%, we increased it by 4%. Block pairs in which performance was above 95% or below 60% were not included in the  $d'$  analyses (8 excluded blocks across all participants; exclusion had no impact on the statistical tests).

Prior to the first block for each task, the experimenter demonstrated the trial sequence and then conducted practice trials until the participant could describe how the cues were predictive of the onset time of the target. For subsequent blocks, the participant first completed two practice trials as a reminder of the format for the temporal cues in the forthcoming block. Participants

received feedback on their performance after these practice trials (but not after any of the staircase or experimental trials).

## Statistical analysis

To quantify discrimination performance, we calculated for each participant a d-prime ( $d'$ ) score separately for each combination of task, target interval and cue validity. These values were calculated by subtracting the z-score of the percentage of hits from the z-score of the percentage of false alarms (referring to vertical and horizontal categories as “stimulus present” and “stimulus absent”, respectively, in classic signal detection terminology). As the “hit” category was arbitrarily assigned to one orientation and the two orientations were equally probable, we did not calculate or analyze the criterion index. An increase in perceptual sensitivity due to temporal anticipation should be manifest as an increase in  $d'$  when the target appeared at the expected time compared to when it appeared at the unexpected time (validity effect).

Previous work indicates that validity effects from temporal cues in two-interval designs such as that used here are usually attenuated for late onset targets, either due to re-orienting of attention in time or foreperiod effects<sup>21</sup>. As such, our *a priori* plan was to focus on the short interval trials to increase sensitivity for detecting attenuation of the validity effect. To confirm that this pattern was present in our data,  $d'$  values were analyzed using an omnibus 4-way mixed ANOVA with a between-subject factor Group (CD / Control), and within-subject factors Task (Interval / Rhythm), Target Interval (Early / Late) and Cue Validity (Valid / Invalid). As expected (see Results), we observed a significant interaction of Cue Validity and Target Interval, and post-hoc comparisons showed that the validity effect was only significant in the Early Interval condition.

The  $d'$  values for short interval targets were analyzed using a mixed ANOVA with a between-subject factor Group (CD / Control), and within-subject factors Task (Interval / Rhythm) and Cue Validity (Valid / Invalid). To assess the effect of cue validity within each group and task, we used within-subject t-tests. To compare the cue validity effect between groups within each task, we used a mixed ANOVA with factors Group (CD / Control) and Cue Validity (valid / invalid). Finally, to assess context-specificity within the CD group, we performed an orthogonal contrast, comparing the cue validity effects between tasks using a repeated-measures ANOVA with factors Task (Interval / Rhythm) and Cue Validity. In all analyses, effect sizes were estimated using Cohen's  $d$  and partial eta-squared ( $\eta_p^2$ ).

335           **Acknowledgements:** We thank Arohi Saxena for assistance in collecting the data.

336   **Funding:** This work was supported by grants from the National Institute of Health (NS092079,

337   NS116883). **Competing Interests:** The authors declare that they have no competing interests.

338   **Author Contributions:** A.B. and R.B.I. conceived the study, designed the experiments, and

339   wrote the paper. A.B. provided software, collected the data, and analyzed the data.

340

## References

1. Nobre, A. C. & Van Ede, F. Anticipated moments: Temporal structure in attention. *Nat. Rev. Neurosci.* **19**, 34–48 (2018).
2. Correa, Á., Lupiáñez, J. & Tudela, P. Attentional preparation based on temporal expectancy modulates processing at the perceptual level. *Psychon. Bull. Rev.* **12**, 328–334 (2005).
3. Rohenkohl, G., Cravo, A. M., Wyart, V. & Nobre, A. C. Temporal Expectation Improves the Quality of Sensory Information. *J. Neurosci.* **32**, 8424–8428 (2012).
4. Coull, J. T. & Nobre, A. C. Where and when to pay attention: the neural systems for directing attention to spatial locations and to time intervals as revealed by both PET and fMRI. *J. Neurosci.* **18**, 7426–35 (1998).
5. Davranche, K., Nazarian, B., Vidal, F. & Coull, J. Orienting attention in time activates left intraparietal sulcus for both perceptual and motor task goals. *J. Cogn. Neurosci.* **23**, 3318–3330 (2011).
6. Bolger, D., Coull, J. T. & Schön, D. Metrical Rhythm Implicitly Orients Attention in Time as Indexed by Improved Target Detection and Left Inferior Parietal Activation. *J. Cogn. Neurosci.* **26**, 593–605 (2014).
7. Posner, M. I. & Peterson, S. E. The Attention System Of The Human Brain. *Annu. Rev. Neurosci.* **13**, 25–42 (1990).
8. Corbetta, M. & Shulman, G. L. Control of goal-directed and stimulus-driven attention in the brain. *Nat. Rev. Neurosci.* **3**, 201–215 (2002).
9. Fiebelkorn, I. C. & Kastner, S. Functional Specialization in the Attention Network. *Annu. Rev. Psychol.* **71**, 221–249 (2020).

10. Breska, A. & Ivry, R. B. Double dissociation of single-interval and rhythmic temporal prediction in cerebellar degeneration and Parkinson's disease. *Proc. Natl. Acad. Sci.* 201810596 (2018) doi:10.1073/pnas.1810596115.
11. Breska, A. & Ivry, R. B. Context-specific control over the neural dynamics of temporal attention by the human cerebellum. *Sci. Adv.* **6**, eabb1141 (2020).
12. Sanabria, D., Capizzi, M. & Correa, Á. Rhythms That Speed You Up. *J. Exp. Psychol. Hum. Percept. Perform.* **37**, 236–244 (2011).
13. Morillon, B., Schroeder, C. E., Wyart, V. & Arnal, L. H. Temporal Prediction in lieu of Periodic Stimulation. *J. Neurosci.* **36**, 2342–2347 (2016).
14. Ivry, R. B. & Keele, S. W. Timing functions of the cerebellum. *J. Cogn. Neurosci.* **1**, 136–152 (1989).
15. Perrett, S. P., Ruiz, B. P. & Mauk, M. D. Cerebellar Cortex Lesions Disrupt Learning-dependent timing of Conditioned Eyelid Responses. *J. Neurosci.* **13**, 1708–1718 (1993).
16. Shalev, N., Nobre, A. C. & van Ede, F. Time for What? Breaking Down Temporal Anticipation. *Trends Neurosci.* **42**, 373–374 (2019).
17. Miniussi, C., Wilding, E. L., Coull, J. T. & Nobre, A. C. Orienting attention in time. Modulation of brain potentials. *Brain* **122**, 1507–1518 (1999).
18. Rohenkohl, G., Gould, I. C., Pessoa, J. & Nobre, A. C. Combining spatial and temporal expectations to improve visual perception. *J. Vis.* **14**, 8–8 (2014).
19. Breska, A. & Deouell, L. Y. Neural mechanisms of rhythm-based temporal prediction: Delta phase-locking reflects temporal predictability but not rhythmic entrainment. *PLoS Biol.* **15**, 1–30 (2017).
20. Green, D. M. & Swets, J. A. *Signal detection theory and psychophysics*. (New York:

Wiley, 1966).

21. Correa, Á., Lupiáñez, J. & Tudela, P. The attentional mechanism of temporal orienting: Determinants and attributes. *Exp. Brain Res.* **169**, 58–68 (2006).
22. Sokolov, A. A., Miall, R. C. & Ivry, R. B. The Cerebellum: Adaptive Prediction for Movement and Cognition. *Trends Cogn. Sci.* **21**, 313–332 (2017).
23. Gómez, C. M. *et al.* Current source density analysis of CNV during temporal Gap paradigm. *Brain Topogr.* **13**, 149–159 (2001).
24. Praamstra, P. Neurophysiology of Implicit Timing in Serial Choice Reaction-Time Performance. *J. Neurosci.* **26**, 5448–5455 (2006).
25. O'Reilly, J. X., Mesulam, M. M. & Nobre, A. C. The Cerebellum Predicts the Timing of Perceptual Events. *J. Neurosci.* **28**, 2252–2260 (2008).
26. Townsend, J. *et al.* Spatial attention deficits in patients with acquired or developmental cerebellar abnormality. *J. Neurosci.* **19**, 5632–5643 (1999).
27. Allen, G., Buxton, R. B., Wong, E. C. & Courchesne, E. Attentional activation of the cerebellum independent of motor involvement. *Science (80-. ).* **275**, 1940–1943 (1997).
28. Ravizza, S. M. & Ivry, R. B. Comparison of the basal ganglia and cerebellum in shifting attention. *J. Cogn. Neurosci.* **13**, 285–297 (2001).
29. Haarmeier, T. & Thier, P. The attentive cerebellum - Myth or reality? *Cerebellum* **6**, 177–183 (2007).
30. Haegens, S. & Zion Golumbic, E. Rhythmic facilitation of sensory processing: A critical review. *Neurosci. Biobehav. Rev.* **86**, 150–165 (2018).
31. Drake, C. & Botte, M. C. Tempo sensitivity in auditory sequences: Evidence for a multiple-look model. *Percept. Psychophys.* **54**, 277–286 (1993).

32. Grube, M., Cooper, F. E., Chinnery, P. F. & Griffiths, T. D. Dissociation of duration-based and beat-based auditory timing in cerebellar degeneration. *Proc. Natl. Acad. Sci.* **107**, 11597–11601 (2010).
33. Spencer, R. M. C., Zelaznik, H. N., Diedrichsen, J. & Ivry, R. B. Disrupted timing of discontinuous but not continuous movements by cerebellar lesions. *Science (80-. )*. **300**, 1437–1439 (2003).
34. Ivry, R. B. & Schlerf, J. E. Dedicated and intrinsic models of time perception. *Trends Cogn. Sci.* **12**, 273–280 (2008).
35. Wolpert, D. M., Miall, R. C. & Kawato, M. Internal models in the cerebellum. *Trends Cogn. Sci.* **2**, 338–347 (1998).
36. Miall, R. C., Weir, D. J., Wolpert, D. M. & Stein, J. F. Is the cerebellum a smith predictor? *J. Mot. Behav.* **25**, 203–216 (1993).
37. Schmitz-Hübsch, T. *et al.* Scale for the assessment and rating of ataxia: Development of a new clinical scale. *Neurology* **66**, 1717–1720 (2006).
38. Pelli, D. G. The VideoToolbox software for visual psychophysics: transforming numbers into movies. *Spat. Vis.* **10**, 437–42 (1997).
39. Brainard, D. H. The Psychophysics Toolbox. *Spat. Vis.* **10**, 433–436 (1997).
40. Levitt, H. Transformed Up-Down Methods in Psychoacoustics. *J. Acoust. Soc. Am.* **49**, 467–477 (1971).
